# Supplementary material for: The selective deprotonation of carbon quantum dots for fluorescence detection of phosphate and visualization of latent fingerprints
Source: Royal Society of Chemistry journal article supplement (doi:10.1039/d1nr02432a), 2021-01-01
Supplement: d1nr02432a1.pdf [file d1nr02432a1.pdf]

# Supporting information

## for

### The selective deprotonation of carbon quantum dots for fluorescent detection of phosphate and visualization of latent fingerprints

Li Yang, Qi Zhang, Ying Han, Hongjuan Li, Shiguo Sun and Yongqian Xu\*

Shaanxi Key Laboratory of Natural Products & Chemical Biology, College of Chemistry &  
Pharmacy, Northwest A&F University, Yangling, Shaanxi, 712100, P.R. China

\*Corresponding author (E-mail address: [xuyq@nwsuaf.edu.cn](mailto:xuyq@nwsuaf.edu.cn))

#### Quantum yield measurement

The quantum yield (QY) of the CQDs was determined according to the established method using quinine sulfate (QY is 0.54 in 0.1 M H<sub>2</sub>SO<sub>4</sub>) as a reference.<sup>1</sup> In order to minimize the reabsorption effects, the absorbencies of solution in the 10 mm fluorescence cuvette were kept between 0.02 to 0.1. The QY of the QDs was calculated according to the below equation:

$$\varphi_x = \varphi_{re} \times (I_x/I_{re}) \times (A_{re}/A_x) \times (n_x/n_{re})^2$$

Where  $\varphi$  is the QY,  $I$  is the integrated area of emission spectrum,  $A$  is the absorbance and  $n$  is the refractive index of the solvent. The subscript “x” and “re” refer to the sample and the reference, respectively.

#### Fluorescence life time test

Fluorescence life time was determined using time correlated single photon counting technique.<sup>2</sup> Decays were recorded for CQDs with emission and excitation wavelengths at 448 nm and 375 nm respectively. Decay curves were fitted using multi

exponential model as the following Eq1:

$$R(t) = B_1 e^{(-t/\tau_1)} + B_2 e^{(-t/\tau_2)} + B_3 e^{(-t/\tau_3)} \quad (1)$$

where  $R(t)$  is the intensity usually as summed to decay as the sum of individual single exponential decays,  $B_1$ ,  $B_2$  and  $B_3$  are the pre-exponential factors,  $\tau_1$ ,  $\tau_2$  and  $\tau_3$  are the decay times. The average life time ( $\tau_{ave}$ ) of CQDs in the presence of different concentration of Pi in water (pH=7.4) solution was determined by Eq2.

$$\tau_{ave} = \frac{\sum_i B_i \tau_i^2}{\sum_i B_i \tau_i} \quad (2)$$

### Cytotoxicity test

The cytotoxicity of CQDs was tested according to the standard MTT assays. HL7702 cells were seeded in 96-well plates (NEST) with the intensity of  $8 \times 10^4$  cells  $\text{mL}^{-1}$ . The HL7702 cells were cultured by using CQDs solution with different concentration (0, 25, 50, 100, 200, and 300  $\mu\text{g/mL}$ ) for 24 h. The absorbance of each well at 490 nm was measured with a microplate reader, and the relative survival rate of the cells after 24 h was calculated.

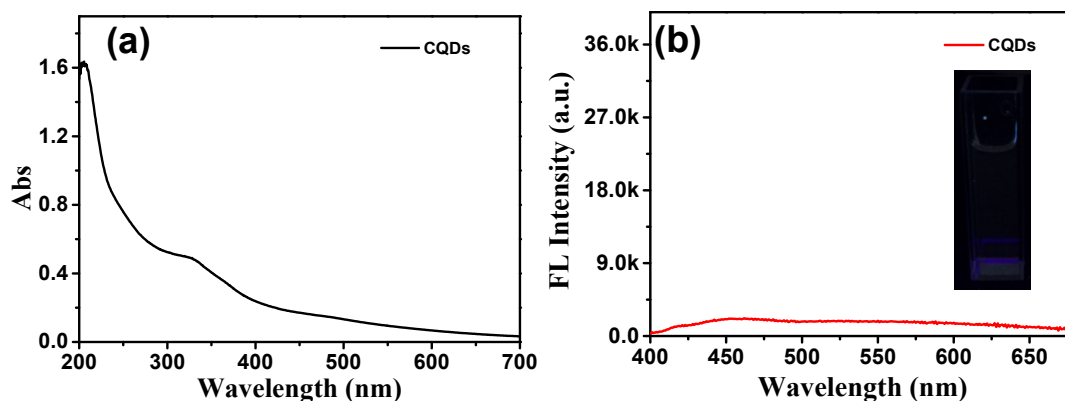

**Fig. S1** (a) The UV-Vis absorption spectra of CQDs (20  $\mu\text{g/mL}$ ) in water solution (pH=7.4). (b) The fluorescence spectra of CQDs (Ex=365 nm, 20  $\mu\text{g/mL}$ ) in water solution (pH=7.4). Inset: Photographs of CQDs in water solution (pH=7.4) under UV irradiation of 365 nm.

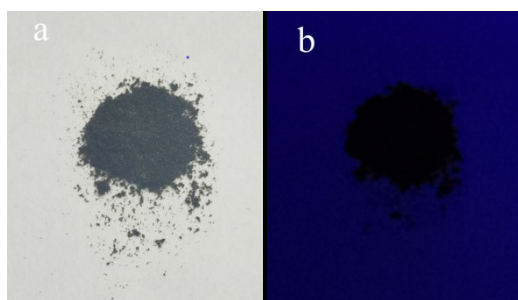

**Fig. S2** The photographs of CQDs powder under daylight (a) or excitation with UV 365 nm light (b).

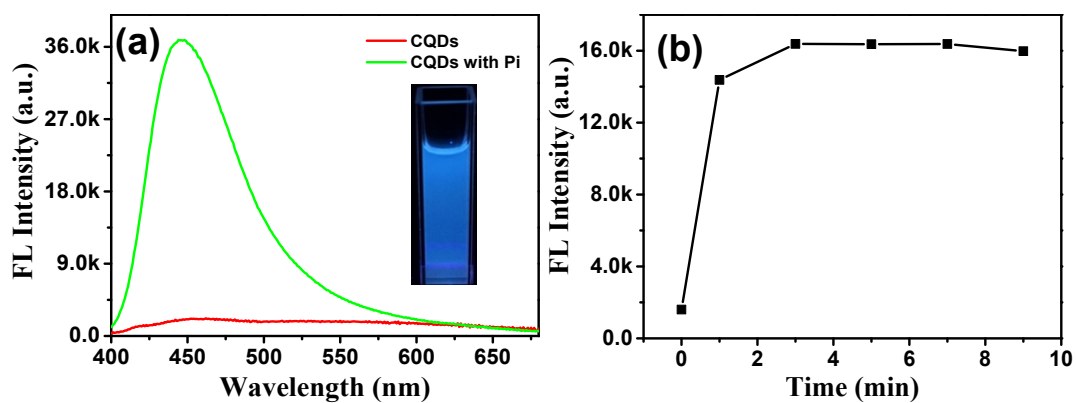

**Fig. S3** (a) The fluorescence spectra of CQDs (20  $\mu\text{g}/\text{mL}$ ) in the absence and presence of Pi (216.67  $\mu\text{M}$ ) in water solution (pH=7.4), Ex=365 nm. Inset: Photographs of CQDs in the presence of Pi (216.67  $\mu\text{M}$ ) in water solution (pH=7.4) under UV irradiation of 365 nm. (b) Optimization of reaction time between Pi and CQDs.

**Table S1** CQD (20  $\mu\text{g/mL}$ ) for the detection of Pi in soda drinks.

| Sample     | Added Pi ( $\mu\text{M}$ ) | Measured Pi ( $\mu\text{M}$ ) | Recovery (%) | RSD% (n=3) |
|------------|----------------------------|-------------------------------|--------------|------------|
| Pepsi Cola | 10.0                       | 10.1                          | 101          | 3.79       |
|            |                            | 10.7                          | 107          |            |
|            |                            | 10.0                          | 100          |            |
|            | 50.0                       | 51.7                          | 103.4        | 2.66       |
|            |                            | 50.9                          | 101.8        |            |
|            |                            | 49.1                          | 98.2         |            |
| Sprite     | 10.0                       | 10.4                          | 104          | 4.36       |
|            |                            | 11.1                          | 111          |            |
|            |                            | 10.3                          | 103          |            |
|            | 50.0                       | 49.3                          | 98.6         | 2.31       |
|            |                            | 49.8                          | 99.6         |            |
|            |                            | 51.5                          | 103          |            |
| Fanta      | 10.0                       | 10.3                          | 103          | 2.65       |
|            |                            | 10.8                          | 108          |            |
|            |                            | 10.4                          | 104          |            |
|            | 50.0                       | 50.2                          | 100.4        | 1.83       |
|            |                            | 49.6                          | 99.2         |            |
|            |                            | 51.4                          | 102.8        |            |

**Table S2** Comparison of different fluorescence sensors comprising heavy metal ions for the detection of Pi.

| Sensing system                                   | Linear range ( $\mu\text{M}$ ) | LOD ( $\mu\text{M}$ ) | Ref.      |
|--------------------------------------------------|--------------------------------|-----------------------|-----------|
| CDs@ZIF-90                                       | 1-50                           | 0.23                  | 3         |
| s-GQDs- $\text{Al}^{3+}$                         | 0.25-7.5                       | 0.1                   | 4         |
| Carbon dots (C-dots)- $\text{Fe}^{3+}$           | 0.4-22                         | 0.25                  | 5         |
| $\text{Mo}_7\text{O}_{24}^{6-}$ -mediated N-GQDs | 7.0-30                         | 0.05                  | 6         |
| Carbon Quantum Dots–Europium(III)                | 1-13.5                         | 0.06                  | 7         |
| CDs/QDs@ZIF-8- $\text{Pb}^{2+}$                  | 0.25-50,<br>0.8-50             | 0.0094,<br>0.0567     | 8         |
| CQDs                                             | 0-100                          | 0.34                  | This work |

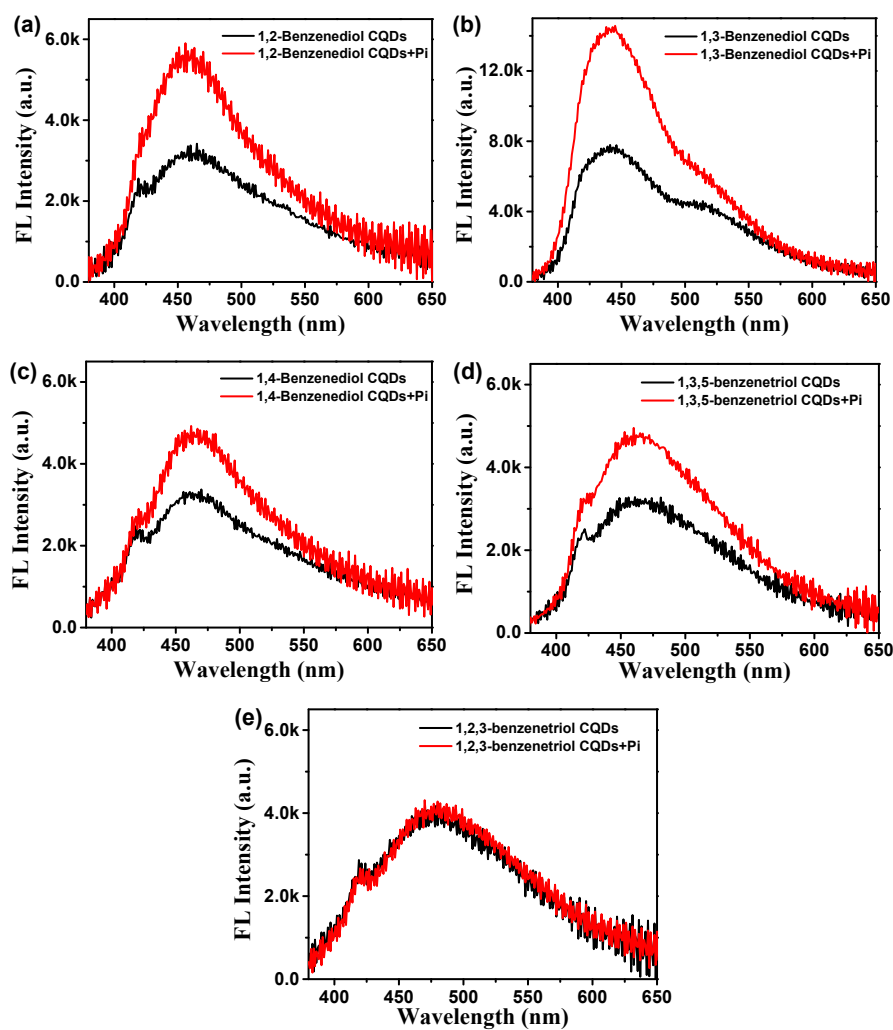

**Fig. S4** The fluorescence spectra change of CQDs (20  $\mu\text{g/mL}$ ) that were prepared from different precursors (*i.e.*, benzenediol and benzenetriol) before and after addition of Pi (100  $\mu\text{M}$ ) in water solution (pH=7.4). The starting materials are 1,2-benzenediol (a), 1,3-benzenediol (b), 1,4-benzenediol (c), 1,3,5-benzenetriol (d), and 1,2,3-benzenetriol CQDs (e), respectively. Excitation wavelength is at 365 nm.

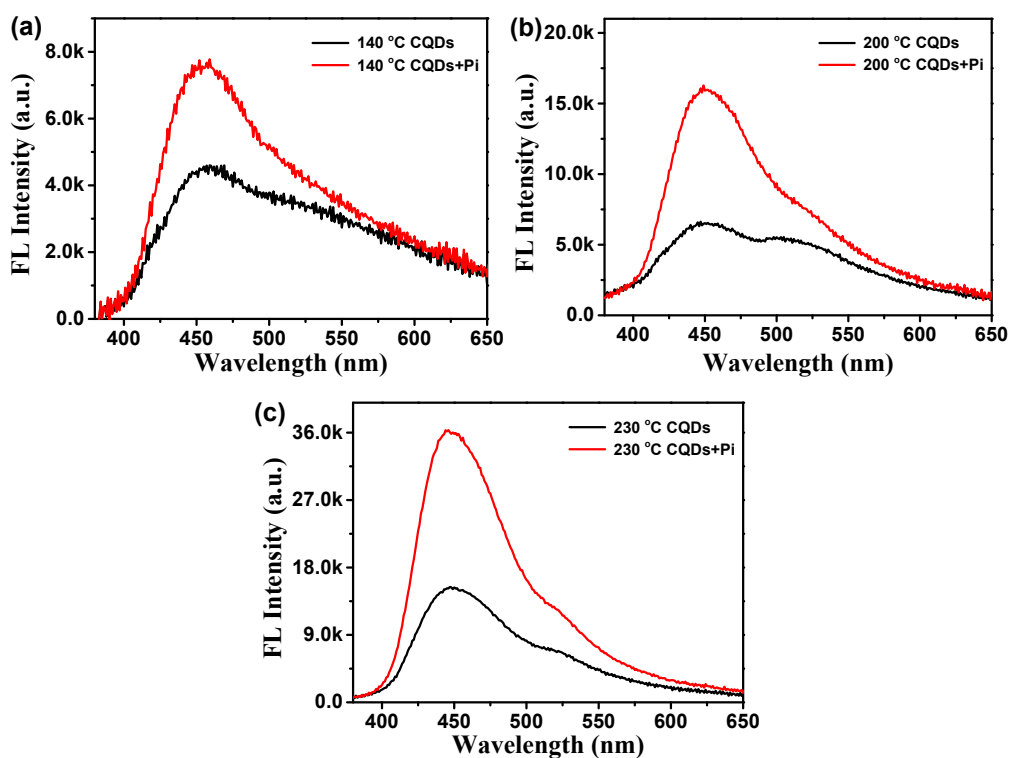

**Fig. S5** The fluorescence spectra change of CQDs (20  $\mu\text{g}/\text{mL}$ ) that were prepared with different temperature (the precursor is 1,2,4-benzenetriol) before and after addition of Pi (100  $\mu\text{M}$ ) in water solution (pH=7.4). The temperatures are at 140  $^{\circ}\text{C}$  (a), 200  $^{\circ}\text{C}$  (b) and 230  $^{\circ}\text{C}$  (c), respectively. Ex=365 nm.

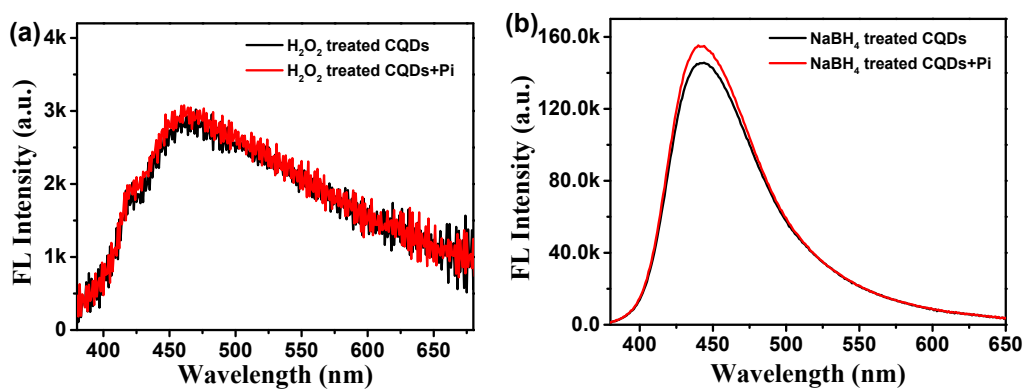

**Fig. S6** The fluorescence spectra change of CQDs (20  $\mu\text{g}/\text{mL}$ ) that were pre-treated with  $\text{H}_2\text{O}_2$  (1M) (a) or  $\text{NaBH}_4$  (0.1M) (b) before and after addition of Pi (100  $\mu\text{M}$ ) in water solution (pH=7.4). Ex=365 nm.

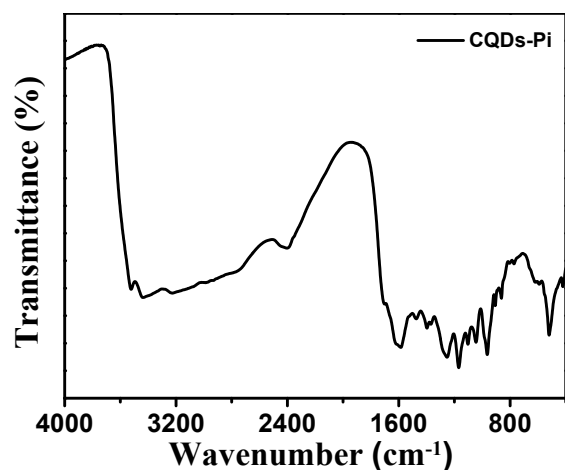

**Fig. S7** FTIR spectra of CQDs in the presence of Pi.

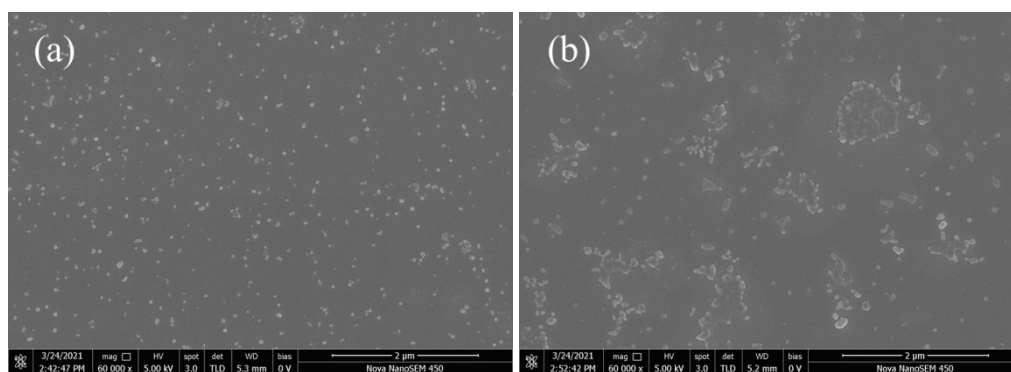

**Fig. S8** SEM images of CQDs (20  $\mu\text{g/mL}$ ) in the absence (a) and presence (b) of 60  $\mu\text{M}$  Pi in water solution (pH=7.4).

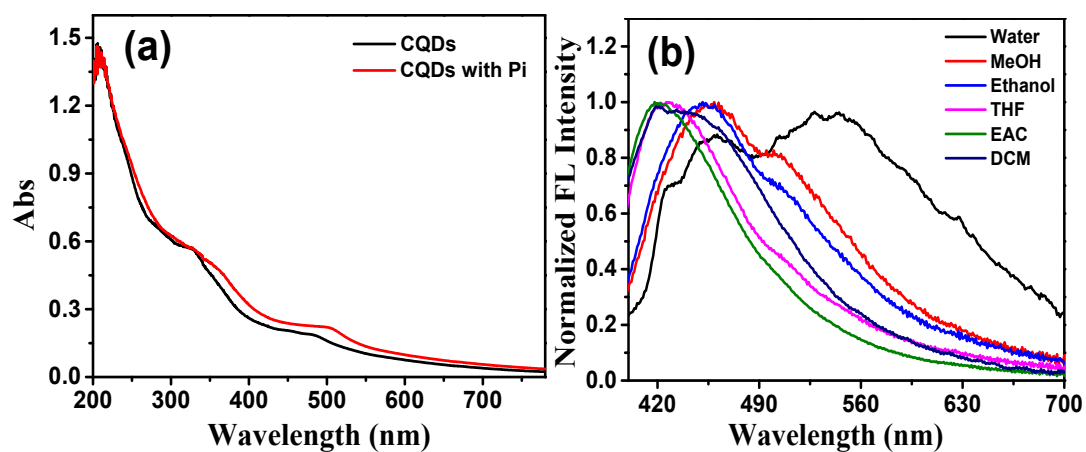

**Fig. S9** (a) The UV-Vis absorption spectra of CQDs (20  $\mu\text{g/mL}$ ) in the absence and presence of Pi (180  $\mu\text{M}$ ) in water solution (pH=7.4). (b) Normalized fluorescence spectra of CQDs (20  $\mu\text{g/mL}$ ) in various solutions. Ex=365 nm.



**Table S3** Fluorescence decay time ( $\tau_{ave}$ ) and pre-exponential factor ( $B$ ) of CQDs in the absence and presence of Pi (66.67  $\mu\text{M}$ ) in water (pH=7.4) solution.

| Sample                      | $\tau_1$ (ns) | $\tau_2$ (ns) | $B_1$   | $B_2$  | $\chi^2$ | $\tau_{ave}$ (ns) |
|-----------------------------|---------------|---------------|---------|--------|----------|-------------------|
| CQDs                        | 1.09          | 5.10          | 2827.95 | 362.94 | 1.17     | 2.60              |
| CQDs-66.67 $\mu\text{M}$ Pi | 1.40          | 4.35          | 2666.62 | 494.55 | 1.23     | 2.47              |

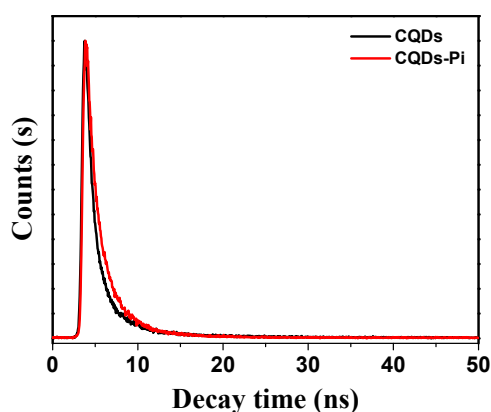

**Fig. S10** Fluorescence decay of CQDs in the absence and presence of Pi (66.67  $\mu\text{M}$ ) in water solution (pH=7.4). The emission was monitored at 440 nm and excitation was at 375 nm.

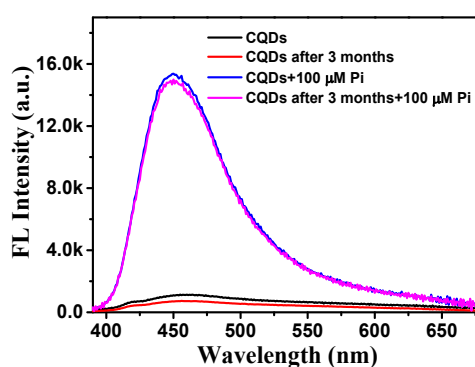

**Fig. S11** The fluorescence spectra of the as-synthesized CQDs (20  $\mu\text{g/mL}$ ) solution in the absence and presence of Pi (100  $\mu\text{M}$ ), and the CQDs solution being stored for 3 months before and after addition of Pi in water solution (pH=7.4).

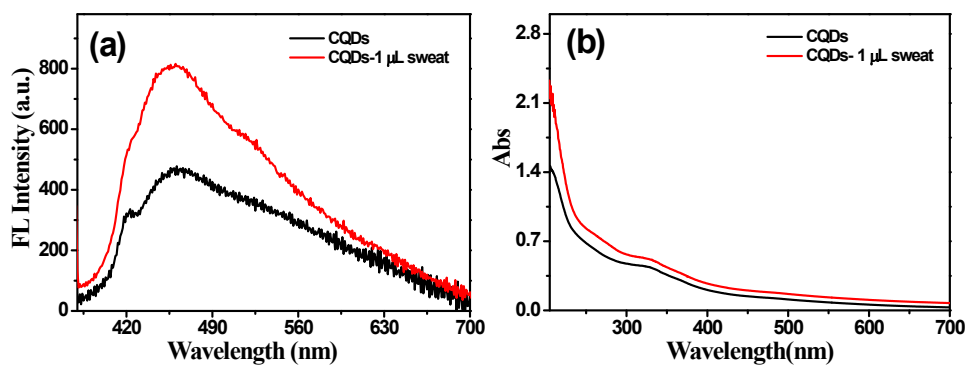

**Fig. S12** The fluorescence spectra (a) and absorption spectra (b) of CQDs (20  $\mu\text{g/mL}$ ) solution without and with 1  $\mu\text{L}$  sweat in water solution (pH=7.4).  $E_x=365$  nm.

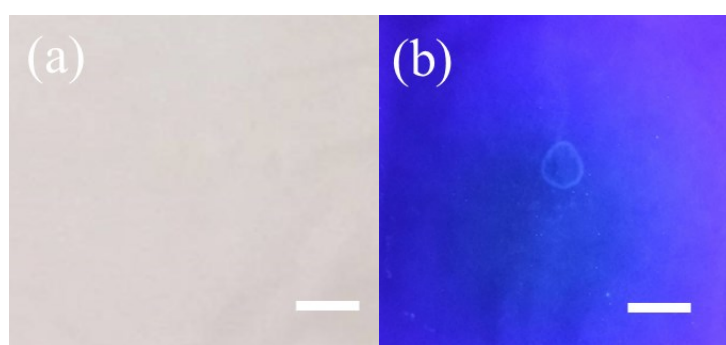

**Fig. S13** The photographs of the paper that was sprayed with CQDs (20  $\mu\text{g/mL}$ ), followed with addition of 1  $\mu\text{L}$  sweat under daylight (a) and UV 365 nm light (b). Scale bar: 1 cm.

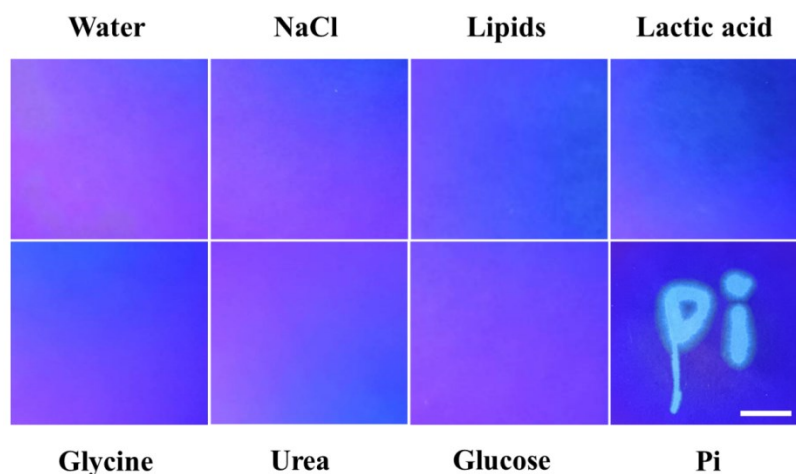

**Fig. S14** Fluorescence images (under 365 nm irradiation) of characters “Pi” written with different substances common in LFPs and sprayed with a CQDs (20  $\mu\text{g/mL}$ ) aqueous solution. Scale bar: 2 cm.

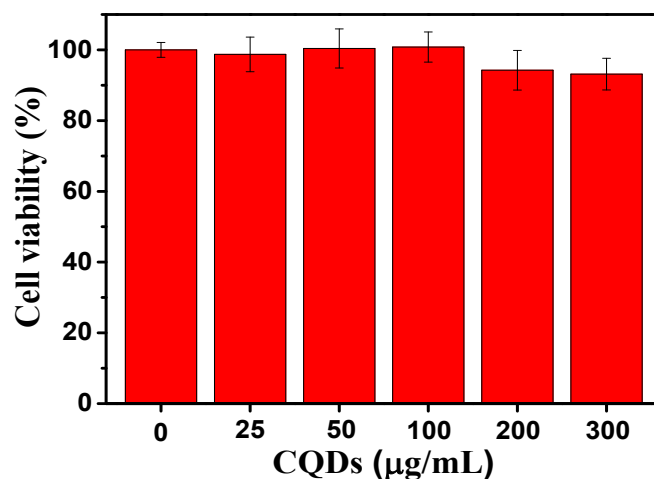

**Fig. S15** The viability of HL7702 cells after incubation with different concentration of CQDs for 24 h.

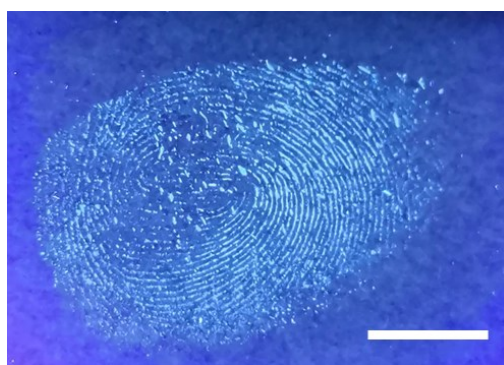

**Fig. S16** Fluorescence image of paper that was sprayed with CQDs (20 µg/mL) and finger touched after being stored at room temperature for 30 days. Scale bar: 1 cm.

## References

1. K. Jiang, S. Sun, L. Zhang, Y. Lu, A. Wu, C. Cai and H. Lin, *Angew. Chem. Int. Ed.*, 2015, **54**, 5360-5363.
2. Y. Zhang, P. Cui, F. Zhang, X. Feng, Y. Wang, Y. Yang and X. Liu, *Talanta*, 2016, **152**, 288-300.
3. Z. Wu, H. Yang, S. Pan, H. Liu and X. Hu, *ACS Sensors*, 2020, **5**, 2211-2220.
4. B. B. Chen, R. S. Li, M. L. Liu, H. Y. Zou, H. Liu and C. Z. Huang, *Talanta*, 2018, **178**, 172-177.
5. W.-S. Zou, W.-L. Kong, Q.-C. Zhao, J. Zhang, X. Zhao, D. Zhao and Y.-Q. Wang, *Microchimica Acta*, 2019, **186**, 576.
6. Y. Wang, W. Weng, H. Xu, Y. Luo, D. Guo, D. Li and D. Li, *Anal. Chim. Acta*, 2019, **1080**, 196-205.
7. R. S. Li, J. H. Liu, T. Yang, P. F. Gao, J. Wang, H. Liu, S. J. Zhen, Y. F. Li and C. Z. Huang, *Anal. Chem.*, 2019, **91**, 11185-11191.

8. K. Yi and L. Zhang, *J. Hazard. Mater.*, 2020, **389**, 122141.
